# Supplementary material for: Rising Prostate Cancer Incidence in Sub-Saharan Africa: A Trend Analysis of Data from the African Cancer Registry Network
Source: Oxford University Press journal article supplement (doi:10.1158/1055-9965.epi-20-1005), 2020-10-08
Supplement: 10559965epi201005-sup-246437_3_supp_6582358_qgsv8d.docx [file 10559965epi201005-sup-246437_3_supp_6582358_qgsv8d.docx]

**Rising prostate cancer incidence in sub-Saharan Africa:
a trend analysis of data from the African Cancer Registry Network**

Tobias P. Seraphin; W. Yvonne Joko-Fru; Bakarou Kamaté; Eric Chokunonga;
Henry Wabinga; Nontuthuzelo I.M. Somdyala,; Shyam S. Manraj; Olufemi Ogunbiyi;
Charles P. Dzamalala; Anne Finesse; Ann Korir; Guy N’Da; Cesaltina Lorenzoni, Biying Liu;
Eva J. Kantelhardt; Donald M. Parkin

**Supplementary Figures:**

**Supplementary Figure 1A:**
Results of the joinpoint regression modelling of the age-standardised incidence rates, showing the best fits per registry, first half of the registries

**Supplementary Figure 1B:**Results of the joinpoint regression modelling of the age-standardised incidence rates, showing the best fits per registry, second half of the registries

**Supplementary Figure 2:**
Number of cases by age in years by registry


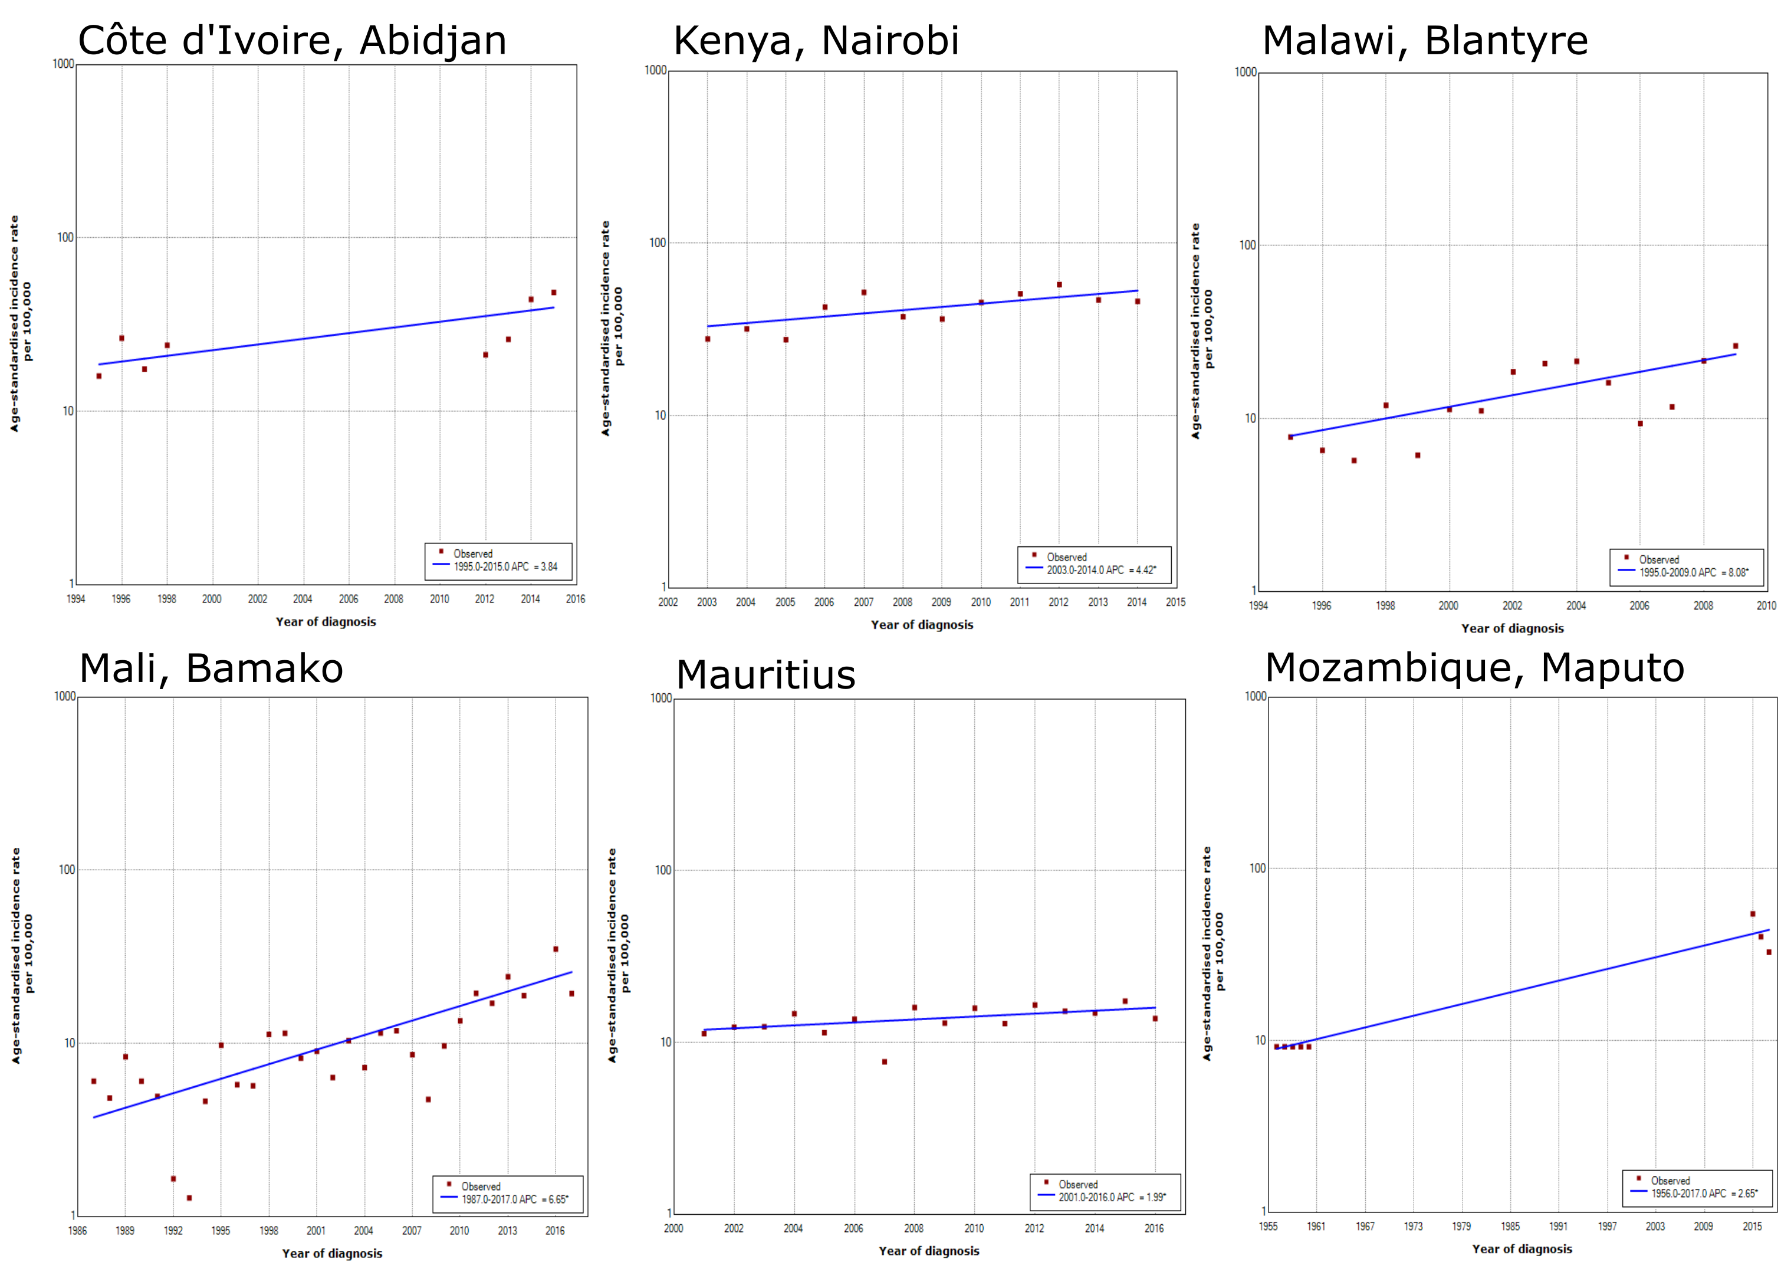


**Supplementary Figure 1A :**Results of the joinpoint regression modelling of the age-standardised incidence rates, showing the best fits per registry, first half of the registries


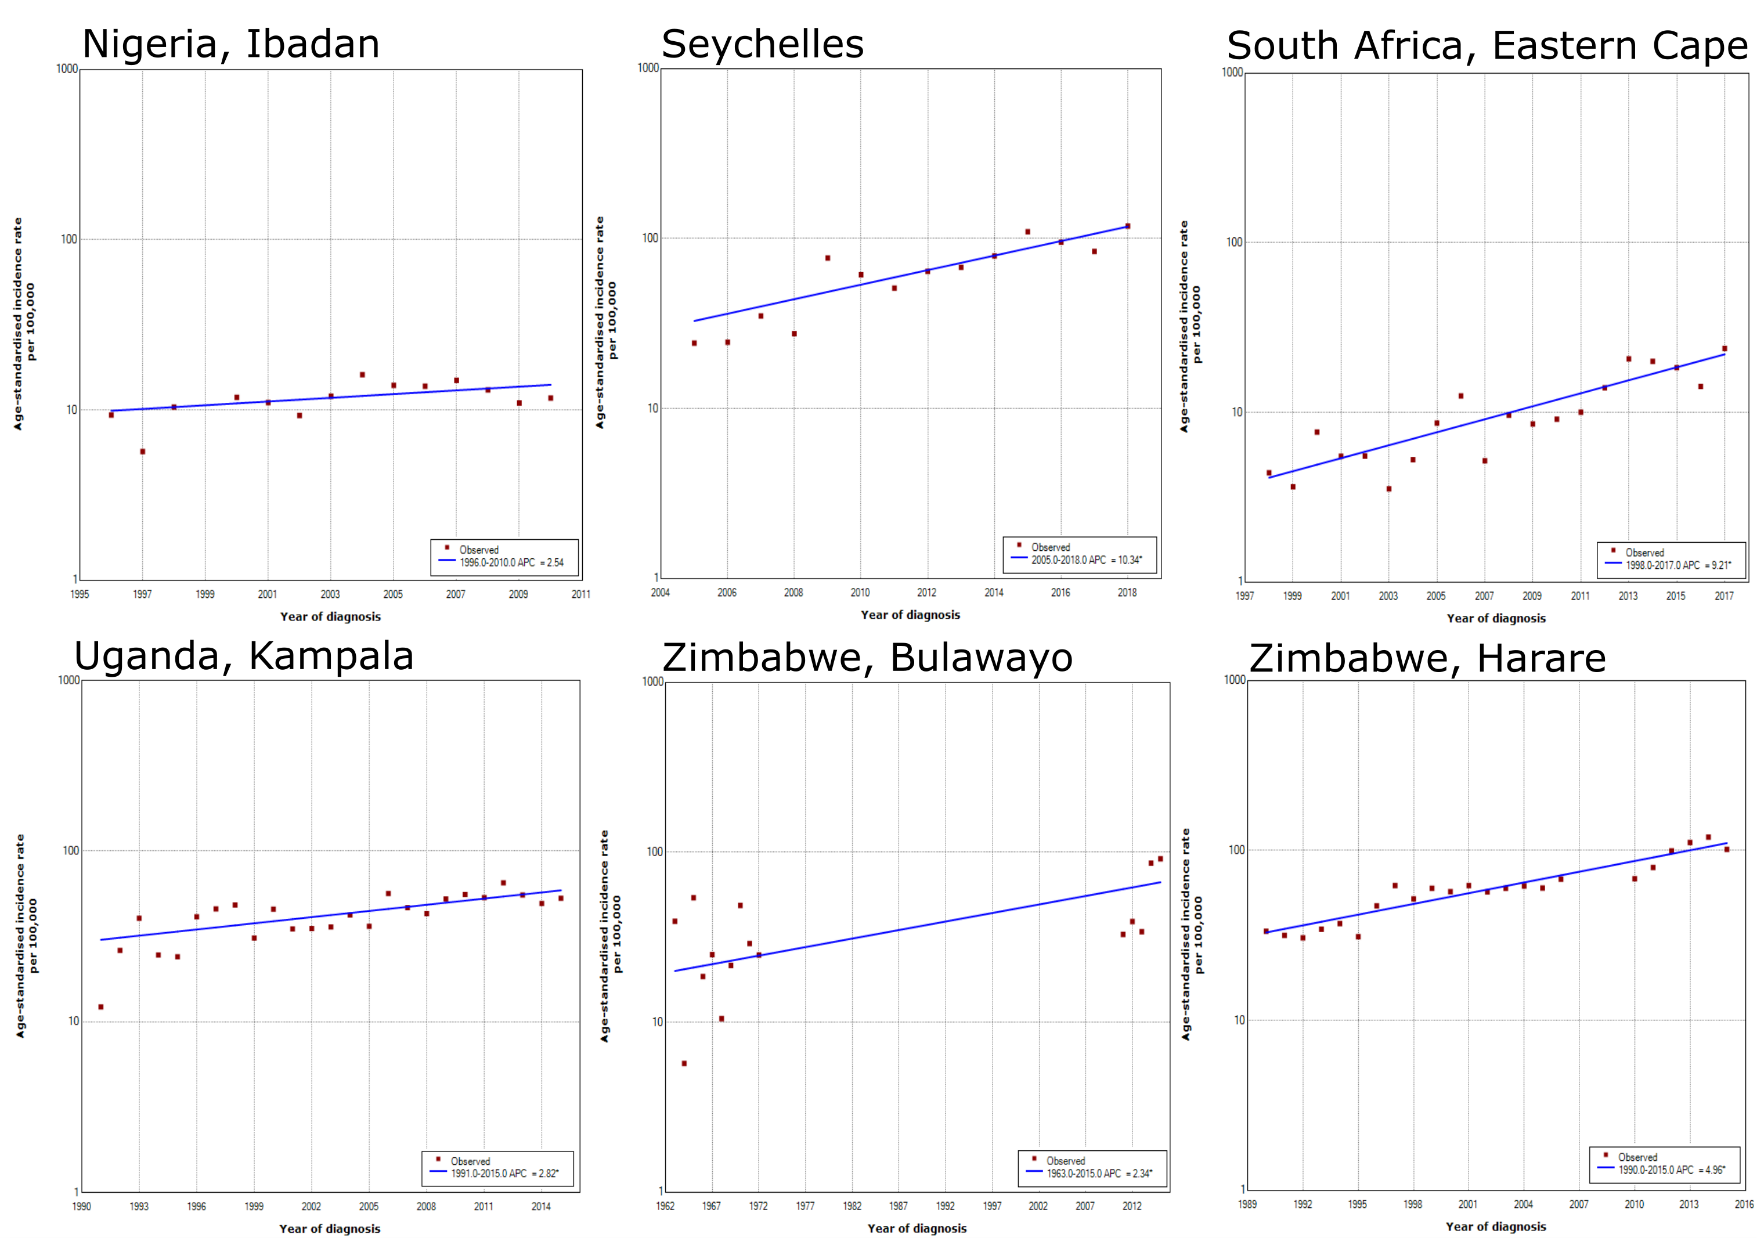


**Supplementary Figure 1 B:**Results of the joinpoint regression modelling of the age-standardised incidence rates, showing the best fits per registry, second half of the registries


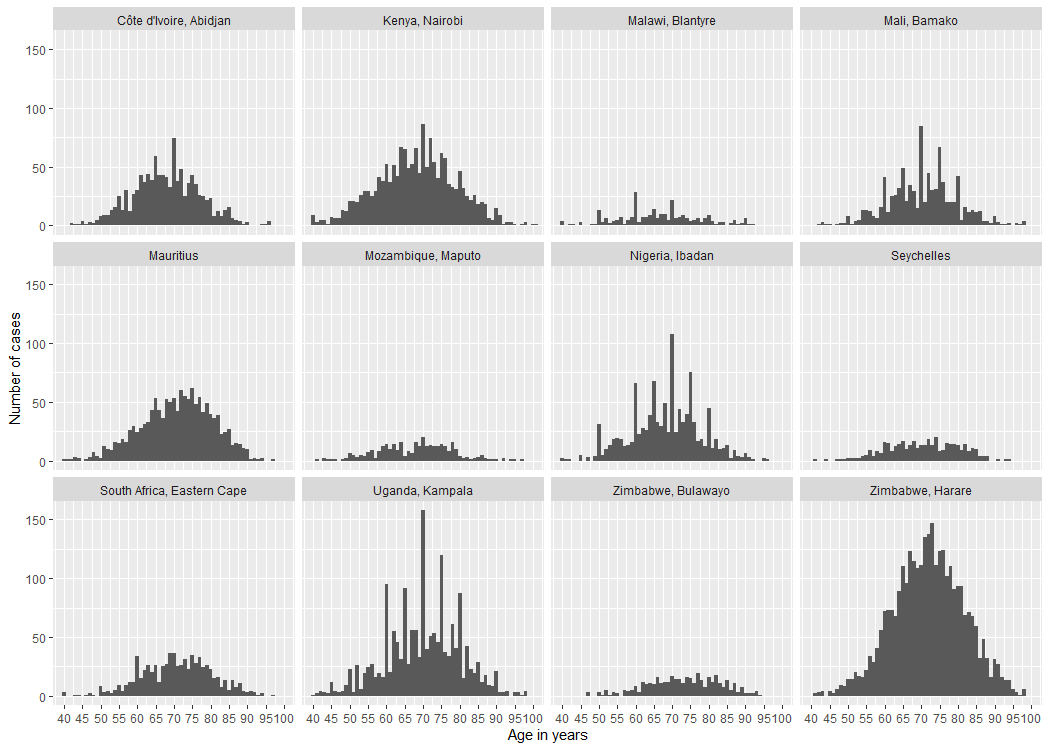


**Supplementary Figure 2:**
Number of cases by age in years by registry
